# Supplementary material for: Synaptic mechanisms underlying modulation of locomotor-related motoneuron output by premotor cholinergic interneurons
Source: eLife. 2020 Feb 21;9:e54170. doi: 10.7554/eLife.54170 (PMC7062467; doi:10.7554/eLife.54170)
Supplement: Figure 1—source data 1. [file elife-54170-fig1-data1.xlsx]

## Sheet: Figure 1
L1-L3			L4-L6
0.3105	0.9505		0.4943	0.5152
0.3027	0.9359		-0.2222	0.4071
0.3091	0.8738		-0.1547	0.2883
0.2926	0.8054		0.0762	0.2809
0.3921	0.7978		0.0757	0.2612
0.4167	0.7081		0.2276	0.2674
0.3755	0.6207		0.1297	0.1447
0.7731	0.5209		0.8463	0.0913
0.3061	0.6213		0.4868	0.01677
0.06783	0.6331		0.2193	-0.02964
0.1494	0.58		-0.479	0.2616
0.1956	0.5295		-0.06873	0.1221
0.2476	0.5189		0.03077	0.08414
0.1987	0.4881		0.08321	0.04788
0.03525	0.529		0.03918	0.03901
-0.02232	0.4194		0.02139	0.0185
0.1459	0.3967		0.2126	0.01711
0.1854	0.3795		0.01711	-0.3332
0.5054	0.3632		0.05529	-0.09543
0.5232	0.3464
-0.04126	0.3192
0.04054	0.2158
-0.006799	0.1562
0.1971	0.1076
-0.1449	0.1347
-0.1706	0.05261
-0.2811	-0.1007
-0.1118	-0.1574
0.1566	-0.3896
0.02748	0.1181
-0.004425	0.001582
