# Supplementary material for: Synaptic mechanisms underlying modulation of locomotor-related motoneuron output by premotor cholinergic interneurons
Source: eLife. 2020 Feb 21;9:e54170. doi: 10.7554/eLife.54170 (PMC7062467; doi:10.7554/eLife.54170)
Supplement: Figure 2—source data 1. [file elife-54170-fig2-data1.xlsx]

## Sheet: Figure 2
Figure 2 b			Figure 2 c
Pitx2::Cre;tdTomato;hM4Di			Pitx2::Cre;tdTomato
Spontaneous firing (Hz)			Spontaneous firing (Hz)
Control	CNO		Control	CNO
1.84979	1.08192		0.912204	0.831573
3.4677	3.18516		0.812067	0.662715
1.16171	0.705178		0.669312	0.687266
1.4181	1.18141		0.92864	1.23565
0.441408	0.0979576		1.23729	0.835361
4.4489	3.56776
0.695052	0.342406
0.587682	0.216168
2.0163	1.22556
