# Supplementary material for: Synaptic mechanisms underlying modulation of locomotor-related motoneuron output by premotor cholinergic interneurons
Source: eLife. 2020 Feb 21;9:e54170. doi: 10.7554/eLife.54170 (PMC7062467; doi:10.7554/eLife.54170)
Supplement: Figure 3—figure supplement 1—source data 1. [file elife-54170-fig3-figsupp1-data1.xlsx]

## Sheet: Suppl Fig 1
Figure 3–supplement figure 1
hM4Di
Burst frequency (Hz		Burst duration (ms)		Burst amplitude
Control	CNO	Control	CNO	Control	CNO
0.247	0.357	887.1	847.1	0.4637	0.4733
0.431	0.419	1027.2	825.8	1.444	1.329
0.091	0.056	5518.9	3507.1	0.513	0.487
0.31	0.289	1210.5	1112.2	0.5	0.613
0.207	0.219	2139.1	1270	0.473	0.459
0.143	0.184	1149.9	1109.3	0.565	0.569
0.147	0.139	3092.7	3036.8	0.606	0.604
0.243	0.26	1571.4	1404.3	0.478	0.47
