# Supplementary material for: Synaptic mechanisms underlying modulation of locomotor-related motoneuron output by premotor cholinergic interneurons
Source: eLife. 2020 Feb 21;9:e54170. doi: 10.7554/eLife.54170 (PMC7062467; doi:10.7554/eLife.54170)
Supplement: Figure 3—source data 1. [file elife-54170-fig3-data1.xlsx]

## Sheet: Figure 3
Figure 3c			Figure 3e			Figure 3g												Figure 3d			Figure 3f			Figure 3h
Pitx2::Cre;hM4Di																		Pitx2::Cre;hM4Di
Burst frequency (Hz)			Burst duration (ms)			Burst amplitude			Variance Burst duration (ms)			Variance Burst frequency (Hz)						Burst frequency (Hz)			Burst duration (ms)			Burst amplitude
Control	CNO	Washout	Control	CNO	Washout	Control	CNO	Washout	14555.6	52316.9	11005.1	0.00316396	0.00535551	0.00269393				Methoctramine	Methoctramine + CNO	Washout	Methoctramine	Methoctramine + CNO	Washout	Methoctramine	Methoctramine + CNO	Washout
0.26	0.256	0.453	1108	1070.4	837.5	0.33	0.24	0.27	38994.5	47582.4	122887	0.00587882	0.0233394	0.00397392				0.49	0.465	0.374	865.4	888.8	998.2	1.607	1.633	1.516
0.378	0.311	0.496	876.6	778.2	893.1	0.2826	0.2602	0.3279	3738300	2539210	2470495	8.03007e-05	3.1914e-05	3.16507e-05				0.0544	0.038	0.0471	9626.39	11147.8	10226	0.7922	0.8238	0.6695
0.267	0.159	0.293	1153.5	1110.1	1149.8	0.722	0.616	0.811	2370502	1706347	3614041	4.9834e-05	0.000242813	0.000398276				0.192	0.186	0.21	1396	1510.2	1617.3	0.589	0.585	0.604
0.232	0.175	0.113	1323.7	1025.9	654.9	0.505	0.392	0.392	495858	24360.3	168475	0.00122732	0.000140957	0.000225296				0.22	0.148	0.147	1965.6	2109.5	1955.3	0.522	0.519	0.545
0.0513	0.0562	0.0509	9936.4	8963.7	8140.7	1.0944	1.0496	0.962	157707	31853.6	497012	0.000306812	0.000190988	0.000981344				0.531	0.326	0.455	714.388	757.498	789.041	0.753	0.75	0.668
0.152	0.172	0.164	1921.5	1616.3	1595	0.646	0.6	0.555	89045.4	39087.5	12400.2	0.00943266	0.00330631	0.0014211				0.231	0.174	0.207	2195.8	2553.8	2239.3	1.045	1.045	1.104
0.17	0.184	0.168	1754.5	1699.6	1587.7	0.508	0.501	0.453	145402	196443	102440	0.00241026	0.00288119	0.00524853				0.197	0.169	0.2	2629.79	3050.64	2212.25	1.365	1.289	1.31
0.162	0.196	0.108	2309.24	1744.35	2773.07	0.622	0.557	0.538	97897	615756	148836	0.00141821	0.00757862	0.00164962				0.33	0.432	0.402	1756.9	1029.4	1419.8	0.808	0.65	0.782
0.116	0.2	0.145	2504.3	1745.8	1559	0.872	0.783	0.861	269917	149994	33755.2	0.000355712	0.00224838	0.000778946
0.429	0.563	0.345	1204.03	1022.45	1417.4	0.94	0.875	1.067	64333.7	15919.1	3115.07	0.000786529	0.00182939	0.00164308
0.483	0.37	0.161	954.3	660.2	983.3	0.816	0.759	0.583	31427.2	12647	92787.4	0.00453154	0.00517998	0.0202489
0.16	0.071	0.234	1036.55	1272.29	1210.85	0.689	0.624	0.804	15486.6	106703	48524.4	0.000478575	0.00504103	0.00528087
0.184	0.203	0.396	3194.1	1994.3	1405.9	1.597	1.495	1.658	15930.2	54549.4	161296	0.0413887	0.0176051	0.0476478
0.156	0.288	0.385	2027.3	2033.7	1393.2	1.701	1.45	1.785	100046	286945	4000.16	0.00239677	0.00305604	0.000725332
																						`
