# Supplementary material for: Synaptic mechanisms underlying modulation of locomotor-related motoneuron output by premotor cholinergic interneurons
Source: eLife. 2020 Feb 21;9:e54170. doi: 10.7554/eLife.54170 (PMC7062467; doi:10.7554/eLife.54170)
Supplement: Figure 4—source data 1. [file elife-54170-fig4-data1.xlsx]

## Sheet: figure 4
Figure 4 5d
Pitx2::Cre;tdTomato;hM4Di		Pitx2::Cre;tdTomato;hM4Di		Pitx2::Cre;tdTomato;hM4Di
Spontaneous firing per burst (Hz)		Input resistance (MΩ)		Changes in transient current (pA)
7.2885	1.4045	94	70	164
10.704	5.46991	59	56	82.1
15.7573	4.16302	97	93	19.8
15.0517	6.1808	67	77	150
		140	69	90
		106	58	89.7
		92	77	45.2
		68	61	154
		73	50	92.8
				92.8
				142
