# Supplementary material for: Synaptic mechanisms underlying modulation of locomotor-related motoneuron output by premotor cholinergic interneurons
Source: eLife. 2020 Feb 21;9:e54170. doi: 10.7554/eLife.54170 (PMC7062467; doi:10.7554/eLife.54170)
Supplement: Figure 5—source data 1. [file elife-54170-fig5-data1.xlsx]

## Sheet: Figure 5
Figure5d
V0c neurons per 14µm section
Control	Experimental
3.125	0
2.25	0.375
3.125	0.25
