# Supplementary material for: Synaptic mechanisms underlying modulation of locomotor-related motoneuron output by premotor cholinergic interneurons
Source: eLife. 2020 Feb 21;9:e54170. doi: 10.7554/eLife.54170 (PMC7062467; doi:10.7554/eLife.54170)
Supplement: Figure 6—source data 1. [file elife-54170-fig6-data1.xlsx]

## Sheet: figure6
Figure 6c			Figure 6e			Figure 6g					Figure 6d			Figure 6f			Figure 6h
Wild Type											Pitx2::Cre;vAChT-stop-DTA
Burst frequency (Hz)			Burst duration (ms)			Burst amplitude					Burst frequency (Hz)			Burst duration (ms)			Burst amplitude
Methoctramine	Methoctramine + CNO	Washout	Methoctramine	Methoctramine + CNO	Washout	Methoctramine	Methoctramine + CNO	Washout			Methoctramine	Methoctramine + CNO	Washout	Methoctramine	Methoctramine + CNO	Washout	Methoctramine	Methoctramine + CNO	Washout
0.352	0.33	0.33	1447	1838.9	1481	0.2799	0.2591	0.1939			0.107	0.13	0.175	2386.01	2147.14	1402.84	0.855	0.851	0.839
0.308	0.275	0.32	2446.4	2994.8	2070.7	0.2166	0.1977	0.2184			0.377	0.227	0.17	1267.7	3129.3	1504.7	1.256	1.247	1.085
0.156	0.101	0.173	3299.8	3897.4	3231.8	0.2405	0.2175	0.1714			0.458	0.418	0.428	1102.6	2392.5	1149	1.028	1.118	1.236
0.286	0.232	0.195	1218.6	1838.2	1730.9	0.172	0.1216	0.1771			0.066	0.03	0.051	2269.7	7213.5	5037.8	1.371	1.311	1.568
0.134	0.116	0.189	1367.3	1911.7	1195.4	0.2905	0.203	0.1726			0.501	0.391	0.448	942.4	1239.3	865.7	0.1	0.116	0.166
0.146	0.109	0.157	848.8	949.1	517.6	0.2752	0.2043	0.2161			0.573	0.291	0.49	726.7	1442.1	995	0.842	0.855	0.765
0.323	0.181	0.324	1412.1	1883.5	1046	0.4195	0.2126	0.3792			0.447	0.26	0.312	749.1	1177.3	736.6	1.187	1.12	1.232
0.236	0.217	0.323	1316.5	1590.9	1137.9	0.362	0.36	0.402			0.28	0.2703	0.2995	1459.3	1640	1479.5	0.743	0.712	0.733
0.261	0.235	0.256	1704.9	2133.6	1158.9	0.386	0.346	0.48			0.258	0.23	0.2589	2140.91	2112.82	1972.44	1.393	1.521	1.4518
0.267	0.242	0.21	1608.5	1785.9	945.4	0.581	0.563	0.521			0.24	0.156	0.1	2165	2460	1803	0.458	0.474	0.418
0.293	0.11	0.543	961	1234.9	713.2	0.513	0.469	0.467
0.25	0.201	0.292	1172.9	1605	898.1	0.822	0.671	0.709
