# Supplementary material for: Synaptic mechanisms underlying modulation of locomotor-related motoneuron output by premotor cholinergic interneurons
Source: eLife. 2020 Feb 21;9:e54170. doi: 10.7554/eLife.54170 (PMC7062467; doi:10.7554/eLife.54170)
Supplement: Figure 7—figure supplement 1—source data 1. [file elife-54170-fig7-figsupp1-data1.xlsx]

## Sheet: Suppl Fig 
Figure 7–supplement figure 1
hM3Dq
Rheobase (pA)		Depolarizing block (pA)		Maximum firing (Hz)		Input resistance (MΩ)		mAHP(ms)
Control	CNO	Control	CNO	Control	CNO	Control	CNO	Control	CNO
310	310	110	60	24	26	51	55	-5.07	-5.23
110	60	210	260	27	26	134	128	-8.36	-7.44
210	260	160	160	34	36	72	75	-2.05	-0.92
160	160	360	360	39	38	50	55	-7.5	-7
360	360	210	160	27	27	132	132
210	160	310	310	21	21	106	123
310	310	310	110	34	33	82	67
310	110	610	610	28	36	63	68
610	610	60	60	24	28	27	28
60	60	660	660	31	31	51	50
660	660	260	310	20	21
260	310	260	260	31	33
260	260	60	60	15	12
210	160	210	160	18	17
160	310	160	310	34	27
