# Supplementary material for: Synaptic mechanisms underlying modulation of locomotor-related motoneuron output by premotor cholinergic interneurons
Source: eLife. 2020 Feb 21;9:e54170. doi: 10.7554/eLife.54170 (PMC7062467; doi:10.7554/eLife.54170)
Supplement: Figure 7—source data 1. [file elife-54170-fig7-data1.xlsx]

## Sheet: Figure7
Figure 7a			Figure 7b											Figure 7c							Figure 7d							Figure 7e
Pitx2::Cre;tdTomato;hM3Dq			Pitx2::Cre;hM3Dq				Pitx2::Cre;hM3Dq							Pitx2::Cre;tdTomato;hM3Dq							Pitx2::Cre;tdTomato;hM3Dq							Pitx2::Cre;tdTomato;hM3Dq
Control	CNO		Changes in holding current (pA)				Input resistance (MΩ)							Rheobase (pA)		Depolarizing block (pA)		Maximum firing (Hz)			Rheobase (pA)		Depolarizing block (pA)		Maximum firing (Hz)			Rheobase (pA)		Depolarizing block (pA)		Maximum firing (Hz)
2.76235	4.59452		CNO	Methoctramine+CNO	Guangxitoxin-1E+CNO		Control	CNO	Methoctramine	Methoctramine+CNO	Guangxitoxin-1E	Guangxitoxin-1E+CNO		Control	CNO	Control	CNO	Control	CNO		Methoctramine	Methoctramine+CNO	Methoctramine	Methoctramine+CNO	Methoctramine	Methoctramine+CNO		Guangxitoxin-1E	Guangxitoxin-1E+CNO	Guangxitoxin-1E	Guangxitoxin-1E+CNO	Guangxitoxin-1E	Guangxitoxin-1E+CNO
4.45106	6.55114		-32.7	-0.9	-22		96	94	65.7895	64.3087	61	71.7		160	110	410	510	20	24		510	460	910	910	41	42		960	910	1710	1710	33	34
1.2	1.4		-24	1.2	-18.3		67	76	68.8705	68.7285	61	62		160	110	610	660	22	40		210	260	710	710	27	27		560	410	1060	1010	31	31
0.603	0.94		-44.6	11.6	-24.4		72	89	77.5795	79	54	66		710	710	960	960	7	13		410	410	510	510	8	12		410	560	760	960	27	24
0.2	0.69		0.9	-30	-20.1		52	55	145.773	169.205	55	52		160	110	410	510	20	23		360	410	710	710	40	38		510	460	810	860	18	24
1.97	2.22		-74.5	4.9	-50		75	106	39.2465	52.9381	47	55		360	360	760	810	25	40		560	560	1010	1210	28	30		760	610	1660	1660	45	43
2.36	6.06		-22	-12	-65.9		51	59	81.103	73.8007	27	50		410	360	510	510	9	14		410	40	860	760	24	23		810	960	1660	1610	28	28
1.32	1.41		-8	0	-40		75	70	125.313	150.376	32	46		160	210	310	410	24	27		310	210	1310	910	37	33		1310	1160	1060	1110	20	20
			-10	5.2	-27.2		58	63	53.1632	55.9597	51	59		260	160	460	360	9	16		110	360	660	760	37	28		410	460	1860	1910	24	29
			-34.2	0.6	10.4		148	187						410	360	960	1060	41	43		410	360	1110	1110	40	39		1360	1110	1110	1110	27	33
			-85		-37.9		79	98						460	310	1060	1110	37	37		160	160	660	660	33	34		910	810	2660	2960	34	30
			-35.4											560	560	1660	1910	47	46		310	510	1110	1310	38	33		560	410	1210	1260	32	26
			-70.2											360	310	910	1010	21	24									310	210	610	660	17	21
			-12.5											210	260	960	1110	25	32									660	510	1310	1260	36	36
			-33											660	510	1760	1960	39	47									710	560	1210	1110	27	20
			-38.8											210	210	760	810	34	37
			-50.4											510	460	910	1060	35	35
			-39.7											910	810	1610	1610	30	37
														460	460	760	860	33	37
														110	60	510	560	36	39
														260	210	510	610	30	29
														210	60	910	610	29	26
														210	260	610	710	22	23
														210	210	460	510	17	19
