# Supplementary material for: Synaptic mechanisms underlying modulation of locomotor-related motoneuron output by premotor cholinergic interneurons
Source: eLife. 2020 Feb 21;9:e54170. doi: 10.7554/eLife.54170 (PMC7062467; doi:10.7554/eLife.54170)
Supplement: Figure 8—source data 1. [file elife-54170-fig8-data1.xlsx]

## Sheet: Figure 8
Figure 8a		Figure 8b		Figure 8c			Figure 8d		Figure 8e		Figure 8f				Figure 8g		Figure 8h		Figure 8i				Figure 8j		Figure 8k		Figure 8l
Pitx2::Cre;hM3Dq							Pitx2::Cre;hM3Dq								Pitx2::Cre;hM3Dq								Pitx2::Cre;hM3Dq
Threshold (mV)							mAHP (mV)								inter-spike AHP (mV)								Half-width (ms)
Control	CNO	Methoctramine	Methoctramine+CNO	Guangxitoxin-1E	Guangxitoxin-1E+CNO		Control	CNO	Methoctramine	Methoctramine+CNO	Guangxitoxin-1E	Guangxitoxin-1E+CNO			Control	CNO	Methoctramine	Methoctramine+CNO	Guangxitoxin-1E	Guangxitoxin-1E+CNO			Control	CNO	Methoctramine	Methoctramine+CNO	Guangxitoxin-1E	Guangxitoxin-1E+CNO
-35.46	-39.06	-39.21	-32.7	-32.04	-36.16		-2.99	-2	-3.22	-3.2	-1.85	-3.11			-6.35	-8.06	-7.45	-7.35	-7.75	-6.16			1.54667	1.36308	2.42621	2.58721	1.18284	1.23033
-34.82	-37.15	-39.34	-34.36	-43.23	-45.66		-1.51	-2.3	-1	-1.2	-1.33	-2			-9.98	-11.81	-8.85	-8.76	-6.2	-7.17			1.5426	1.46068	1.44422	1.51363	1.45461	1.43965
-26.1	-30	-32.36	-35.61	-36.53	-37.16		-1.17	-4	-4.13	-1	-1.23	-0.6			-1.96	-3.26	-3.26	-4.88	-6.01	-5.22			1.32339	1.2064	1.11444	1.33422	1.38345	1.38048
-35.36	-34.52	-35.87	-37.63	-30	-31.6		-4.3	-7	-1.89	-1.77	-3.02	-2.91			-2.62	-2.98	-7	-6.9	-10.28	-10.92			1.42208	1.55388	1.85688	2.02877	1.44697	1.41328
-42.92	-46.16			-24.07	-25		-1.74	-1.85	-1.57	-3.23	-1.59	0			-5.34	-6.49	-6.93	-8	-7	-6.71			1.45022	1.44415	1.50023	1.35396	0.978305	1.16222
-31.72	-32.79						-1.24	-2.68	-2.72	-3.92	-1.85	-3.11			-4.87	-5.61	-3.4	-3	-6.53	-6.16			1.13401	1.04004	1.60009	1.59718	1.14952	1.15939
-33	-41.36						-1.08	-1.6	-6.47	-3.54	-0.86	-0.79			-5.19	-7.84	-8.42	-7.82	-11.23	-11.96			1.54333	1.51735	1.38954	1.32747	0.82037	0.879981
-36.1	-37.1						-1.2	-1.47			-0.22	-0.21			-6.5	-7.26	-8.33	-8.43	-10.99	-8.45			1.35408	1.30366	0.862663	0.981033	1.20516	1.11988
-40.99	-44						-0.74	-1.73			-1	-1.03			-4.82	-6.2	-9.37	-10.21	-8.23	-7.97			1.26571	1.01174	1.12489	1.17987	0.883763	1.11569
-55.73	-56						-0.99	-2.02			-1.95	-1.04			-3.5	-4.12	-7.05	-6.99	-4.62	-3.66			1.22343	1.12338	1.44709	1.52695	0.947195	1.04133
-32.68	-37						-0.73	-1.24			-1.21	-0.84			-7.78	-10.13			-5.74	-4.88			1.47393	1.28047	1.02161	1.12513	1.03581	1.04686
							-2.05	-2.4			-0.57	-1.87			-8.06	-10.13			-8.82	-9.03			1.57288	1.49919			1.58146	1.44622
							-2.2	-2.99			-1.35	-3.72			-4.76	-6.02							1.06772	0.948812			1.28383	1.30986
							-1.45	-2.29			-0.75	-1.1			-6.13	-7.84							2.38605	2.29219
							-2.58	-2.61			-0.85	-1.52			-8	-8.82							1.28103	1.23583
							-1.11	-1.64			-2.19	-2.99			-8.02	-9.74							1.20973	1.12983
							-2.4	-2.46							-7.32	-7.51							1.46924	1.45799
							-2	-1.22							-4.73	-5.3							2.16247	1.44641
							-7.54	-9.98							-6.32	-7.69							1.78327	1.61288
							-1.26	-1.89							-4.73	-7.32							1.84789	1.53786
							0	-3.96							-6.62	-7.29
							-4.1	-8.24
