# Supplementary material for: Synaptic mechanisms underlying modulation of locomotor-related motoneuron output by premotor cholinergic interneurons
Source: eLife. 2020 Feb 21;9:e54170. doi: 10.7554/eLife.54170 (PMC7062467; doi:10.7554/eLife.54170)
Supplement: Source data 1. [file elife-54170-data1.xlsx]

## Sheet: Table 1
Table 1
Resistance (MΩ)		Capacitance (pF)		Membrane potential (mV)		Rheobase (pA)		Depolarizing block (pA)		Maximum firing (Hz)
hM3Dq	Pitx2::Cre; hM3Dq	hM3Dq	Pitx2::Cre; hM3Dq	hM3Dq	Pitx2::Cre; hM3Dq	hM3Dq	Pitx2::Cre; hM3Dq	hM3Dq	Pitx2::Cre; hM3Dq	hM3Dq	Pitx2::Cre; hM3Dq
61.8	51	93.52	92.7	-76	-52	310	160	460	410	27	20
84.9	36	99.92	114	-60	-46	110	160	860	610	34	22
94.4	47.2	99	84	-50	-65	210	710	560	960	39	7
68	62	97.26	105.7	-57	-80	160	160	760	410	27	20
47.6	69.9	132.6	131	-66	-68	360	360	560	760	21	25
69.6	83.4	177	114	-58	-63	210	410	910	510	34	9
41.8	60.9	83	83.84	-48	-48	310	160	660	310	28	24
52.9	81.15	121	92.23	-70	-62	310	260	610	460	24	9
48	59.9	128	98.6	-66	-72	610	410	860	960	31	41
58.1	53.6	83	114	-62	-65	60	460	660	1060	20	37
61.8	40	132.6	111	-67	-68	660	560	1010	1660	31	47
65.4	50.5	145	137.6	-66	-58	260	360	610	910	15	21
56.8	44.77	70.8	135.1	-64	-62	260	210	560	960	18	25
79	43.8	108	122	-57	-63	60	660	310	1760	18	39
59.4	78	96	92.33	-48	-69	210	210	660	760	26	34
57.6	46	158.6	123	-45	-63	110	510	610	910	20	35
	33.5		115.8		-60		910		1610		30
	51.6		121.6		-56		460		760		33
	118		95		-69		110		510		36
	58.9		105.7		-30		260		510		30
	40		169.6		-84		210		910		29
	50.5		132.6		-58		210		610		22
	65.5		114		-64		210		460		17

## Sheet: Table 2
Table 2
Resistance (MΩ)			Capacitance (pF)			Membrane potential (mV)			Spontaneous firing (Hz)
Pitx2::Cre;tdTomato	Pitx2::Cre;tdTomato;hM4Di	Pitx2::Cre;tdTomato;hM3Dq	Pitx2::Cre;tdTomato	Pitx2::Cre;tdTomato;hM4Di	Pitx2::Cre;tdTomato;hM3Dq	Pitx2::Cre;tdTomato	Pitx2::Cre;tdTomato;hM4Di	Pitx2::Cre;tdTomato;hM3Dq	Pitx2::Cre;tdTomato	Pitx2::Cre;tdTomato;hM4Di	Pitx2::Cre;tdTomato;hM3Dq
68	237	309	32.29	44	13.69	-57.7	-55	-52.4	5.57	1.84979	2.76235
222	461.5	370	21	21.37	18.85	-45	-58	-52.6	1.15	3.4677	4.45106
653	229.1	400	34.41	26.14	18.85	-57	-46.2	-55	6.64	1.16171	3.1
320	266.4	350	20	28.38	48.63	-48	-49.22	-60	3.04	1.4181	1.2
210	252	254	27	42.41	16.25	-61	-44	-50	1.59	0.441408	0.603
258	265	300	42.76	37.41	21.91	-44	-54	-53	1.79	4.4489	0.2
355	364	300	21	29.65	34.28	-40	-53	-49.3	0.912204	0.695052	1.97
304	436.21	321	24.73	38.8	25.09	-40	-64	-58	0.812067	0.587682	2.36
468	254	272	22.04	48.31	38	-53	-43	-51	0.669312	2.0163	1.32
496			22.96			-65			0.92864
341			26			-64			1.23729

## Sheet: Table 3
Table 3
Burst frequency (Hz)		Burst duration (ms)
hM4Di	Pitx2::Cre; hM4Di	hM4Di	Pitx2::Cre; hM4Di
0.247	0.26	847.1	1108
0.399	0.378	476.1	876.6
0.431	0.267	1027.2	1153.5
0.256	0.232	6998.6	1323.7
0.274	0.0513	5518.9	9936.4
0.046	0.0493	1210.5	8020.1
0.091	0.152	864.5	1921.5
0.31	0.164	2139.1	1595
0.207	0.162	1492.7	1551.2
0.143	0.17	1329.7	1754.5
0.175	0.162	1149.9	2309.24
0.184	0.116	2858.2	2504.3
0.259	0.146	1571.4	1521.08
0.147	0.429	1200	1204.03
	0.226		1235.87
	0.483		954.3
	0.16		1272.29
	0.184		3194.1
	0.156		2027.3
