# Supplementary figures and images for: Synaptic mechanisms underlying modulation of locomotor-related motoneuron output by premotor cholinergic interneurons
Source: eLife journal article supplement (doi:10.7554/elife.54170), 2020-02-21

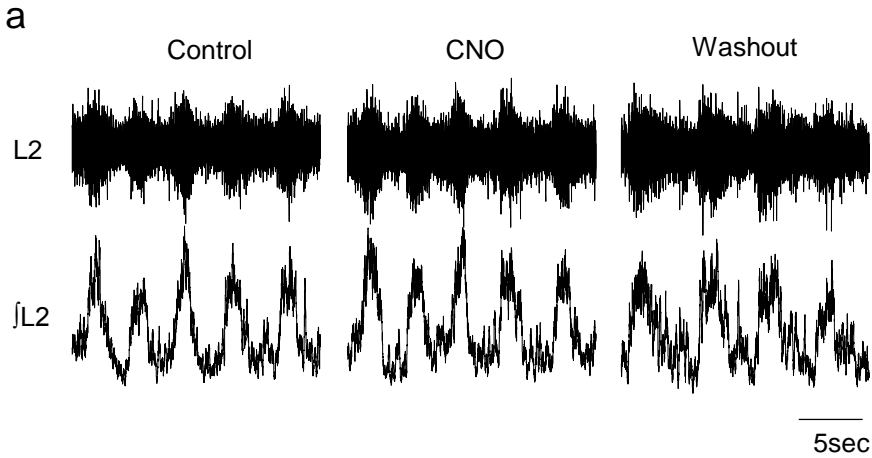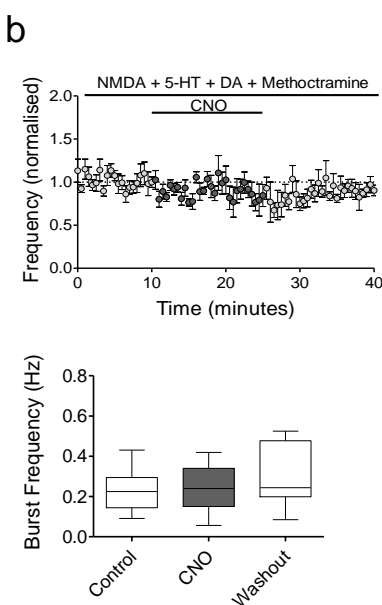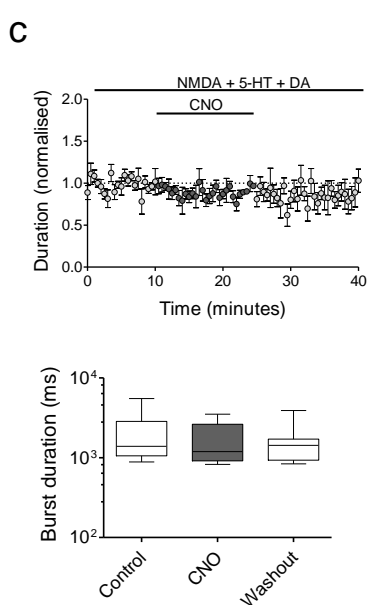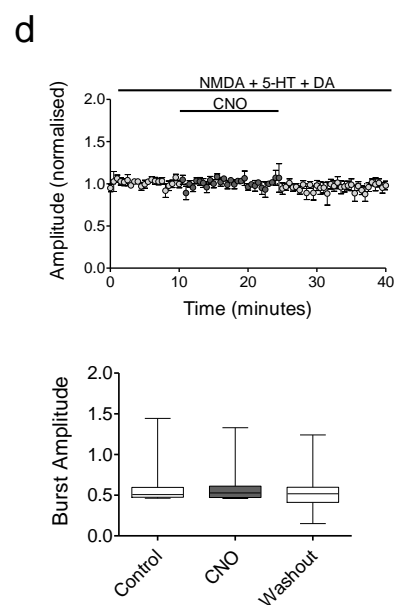

Supplement: supp [file elife_poa_e54170_Figure_3_figure_supplement_1.pdf › elife_poa_e54170_Figure_3_figure_supplement_1.pdf]

**a**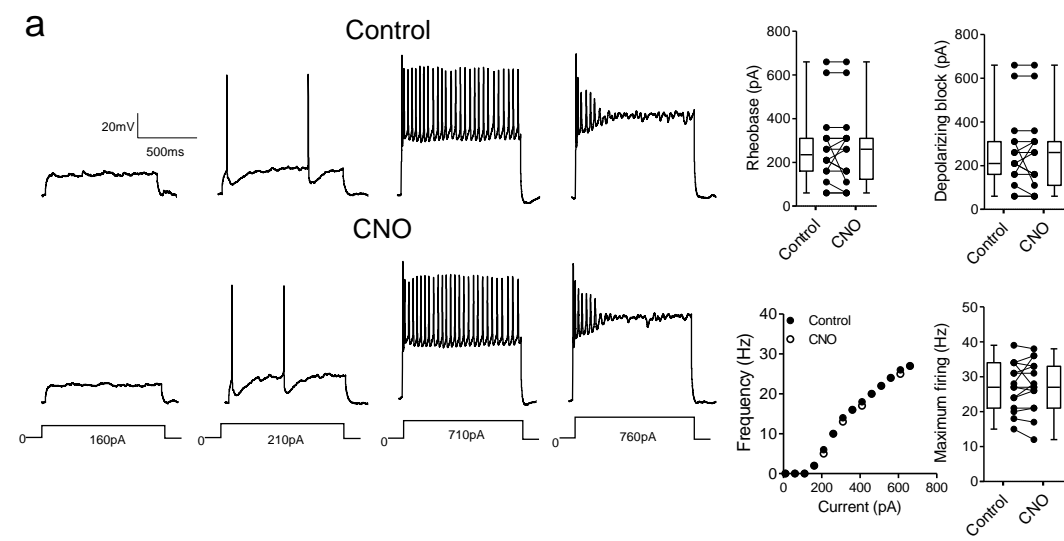**b**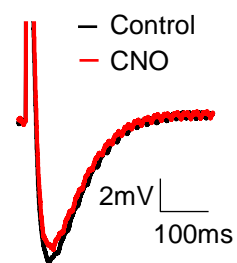

Supplement: supp [file elife_poa_e54170_Figure_7_figure_supplement_1.pdf › elife_poa_e54170_Figure_7_figure_supplement_1.pdf]
